# Supplementary figures and images for: Bacterial Cells Carrying Synthetic Dual‐Function Operon Survived Starvation
Source: Hindawi journal article supplement (doi:10.1155/2011/489265), 2011-01-01

Figure S1

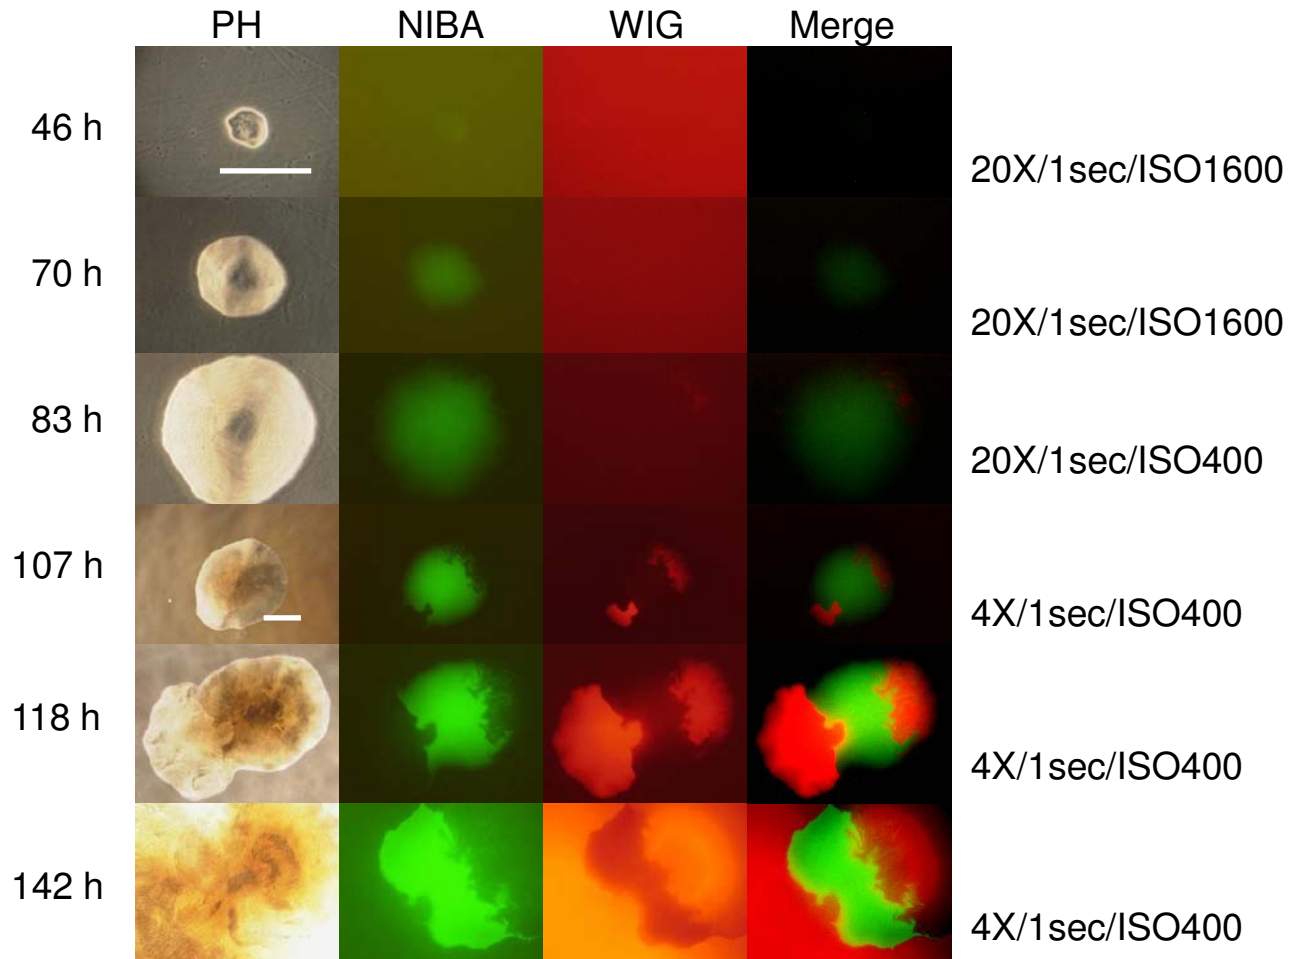

Figure S2

**A**

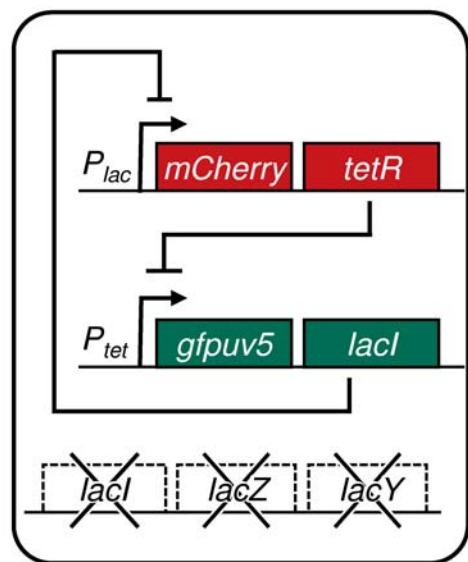

**B**

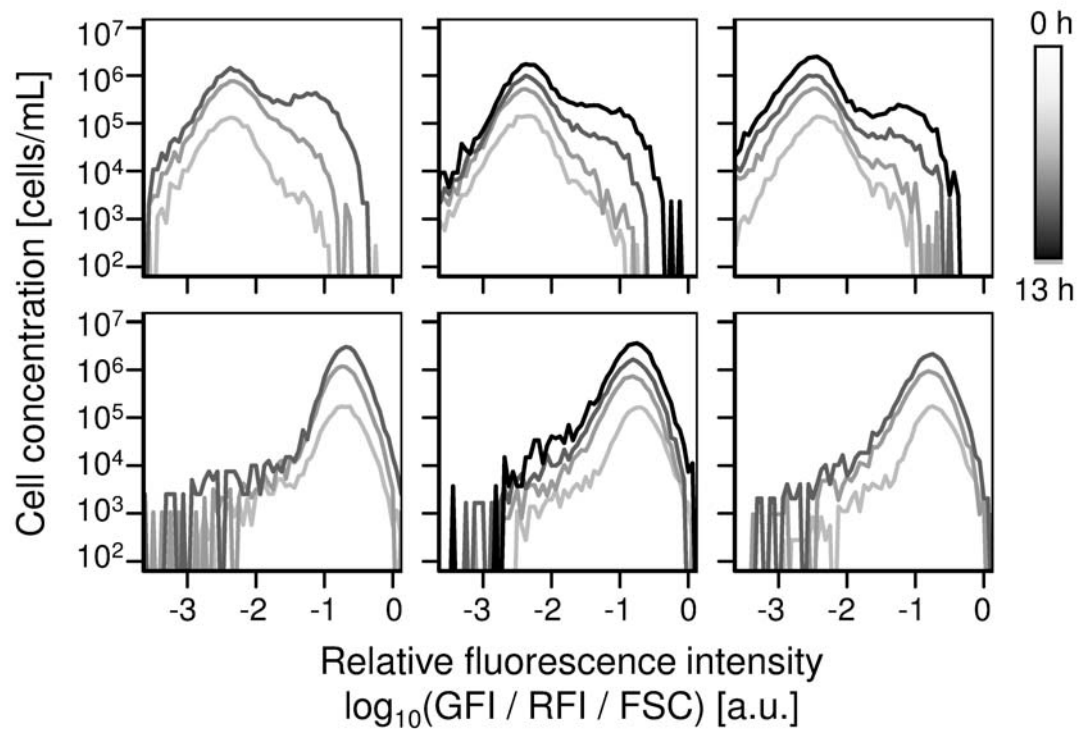

Supplement: f1 [file 489265.f1.pdf]
